# Supplementary material
Source: Springer Nature journal article supplement (https://www.springermedizin.de/resource/supplementary/12958_2010_714_MOESM1_ESM.pdf/9568660)
Supplement: MOESM1 [file 9568660]

**Bulls/Steers  
Pen**

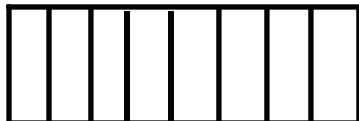

**Intensive blood sampling stalls**

**Front of cow  
Exposure area**

**Calves during  
sampling**

**Alleyway**

**Cows/Calves  
Pen**
